# Supplementary material for: Insulin deprivation induces PP2A inhibition and tau hyperphosphorylation in hTau mice, a model of Alzheimer’s disease-like tau pathology
Source: PubMed Central journal article supplement (PMC5389355; doi:10.1038/srep46359), 2017-04-12
Supplement: srep46359-s2.pdf [file srep46359-s2.pdf]

## SUPPLEMENTARY INFORMATION

### **Insulin deprivation induces PP2A inhibition and tau hyperphosphorylation in hTau mice, a model of Alzheimer's disease-like tau pathology**

Maud Gratuze <sup>a,b</sup>, Jacinthe Julien <sup>b</sup>, Franck R. Petry <sup>a,b</sup>, Françoise Morin <sup>b</sup>,  
Emmanuel Planel <sup>a,b,\*</sup>

a Université Laval, Faculté de médecine, Département de Psychiatrie et  
Neurosciences, Québec, QC, Canada

b Centre de Recherche du CHU de Québec, Axe Neurosciences, Québec, QC,  
Canada

\* Corresponding author at: CHUL, RC-9800, 2705 Boulevard Laurier, Québec, QC,  
Canada, G1V 4G2. Tel. : +1 418 525 4444 #47805 ; fax : +1 418 654 2753.

E-mail adress: [emmanuel@planel.org](mailto:emmanuel@planel.org) (E.Planel).

|                             | ID souris |          |
|-----------------------------|-----------|----------|
| CTL (Saline)                | 004234    |          |
|                             | 004222    |          |
|                             | 004383    |          |
|                             | 004421    |          |
|                             | 004433    |          |
|                             | 004585    |          |
| STZ low dose (Saline)       | 004201    |          |
|                             | 004232    |          |
|                             | 004303    |          |
|                             | 004329    |          |
|                             | 004381    |          |
|                             | 004465    | ← Tau KO |
|                             | 004430    |          |
| STZ LD + Insuline 4IU/kg)   | 004562    |          |
|                             | 004202    |          |
|                             | 004237    |          |
|                             | 004252    |          |
|                             | 004309    |          |
|                             | 004432    |          |
|                             | 004569    |          |
|                             | 004539    |          |
| STZ High dose               | 004570    |          |
|                             | 004177    |          |
|                             | 004217    |          |
|                             | 004376    |          |
|                             | 004878    |          |
|                             | 004920    |          |
|                             | 004923    |          |
|                             | 004871    |          |
| STZ HD + Insuline           | 004904    |          |
|                             | 004178    |          |
|                             | 004206    |          |
|                             | 004331    |          |
|                             | 004485    |          |
|                             | 004530    |          |
|                             | 004584    |          |
|                             | 004879    |          |
| STZ High dose hypothermique | 004909    |          |
|                             | 004471    |          |
|                             | 004544    |          |
|                             | 004496    |          |
|                             | 004491    |          |
|                             | 004542    |          |
| 004889                      |           |          |
|                             | 004918    |          |

Figure 2

1. CP13

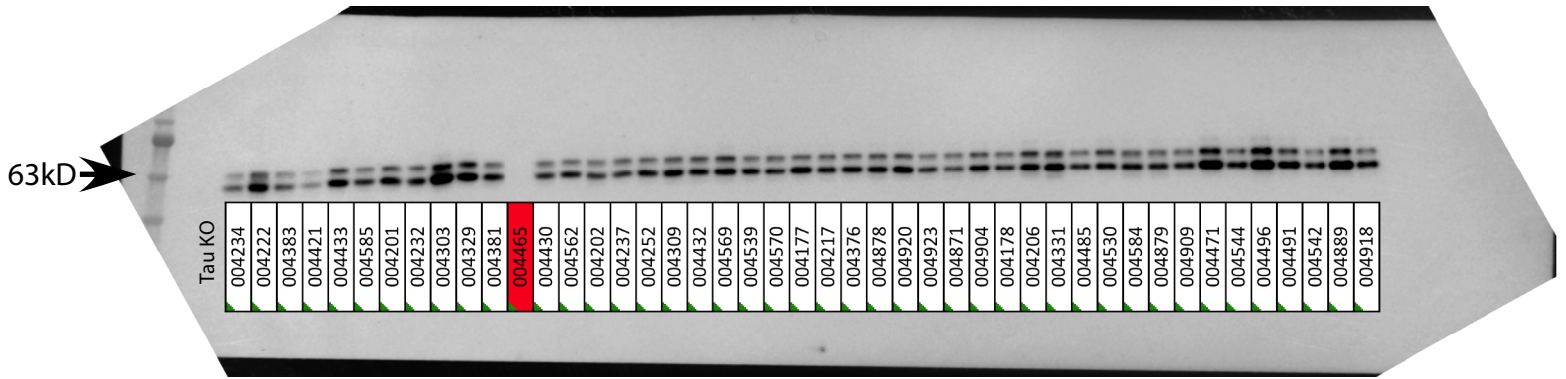

2. AT8

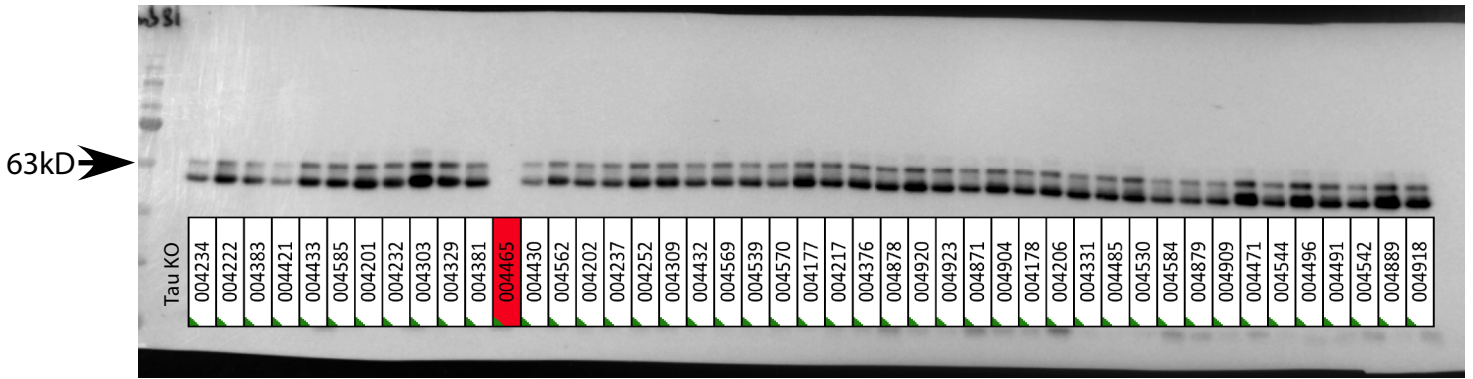

3. pT205

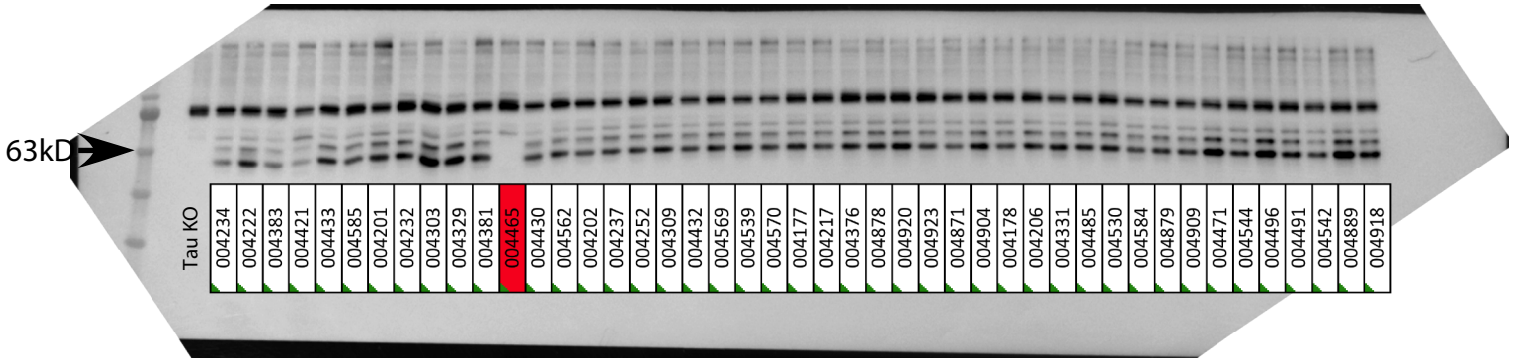

4. AT180

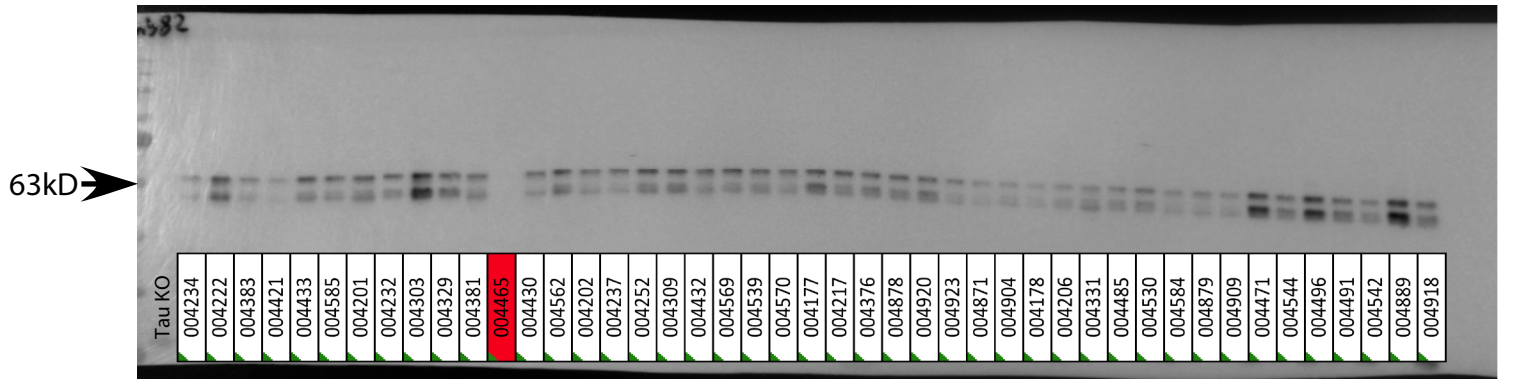

## 5. PHF1

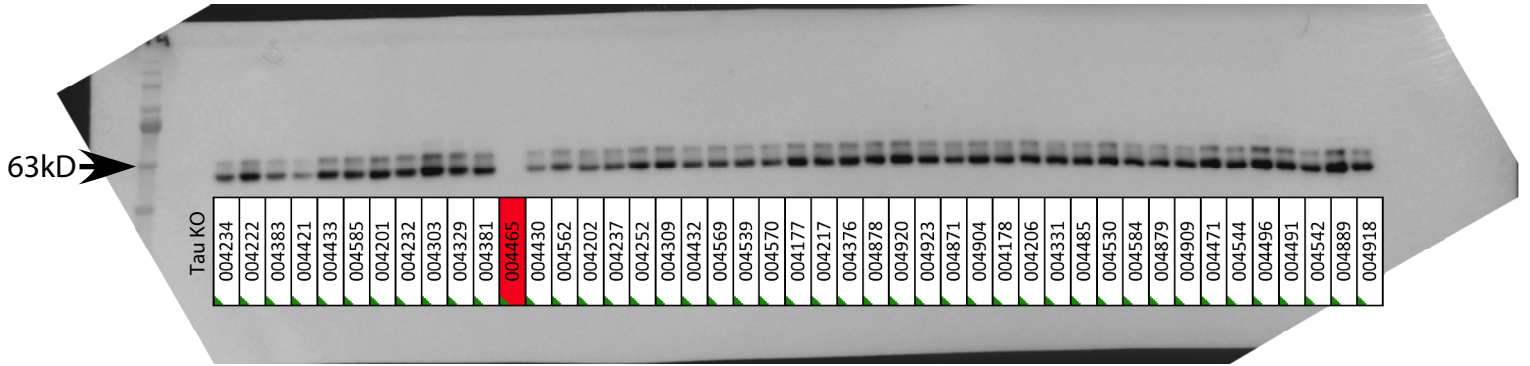

## 6. Tau1

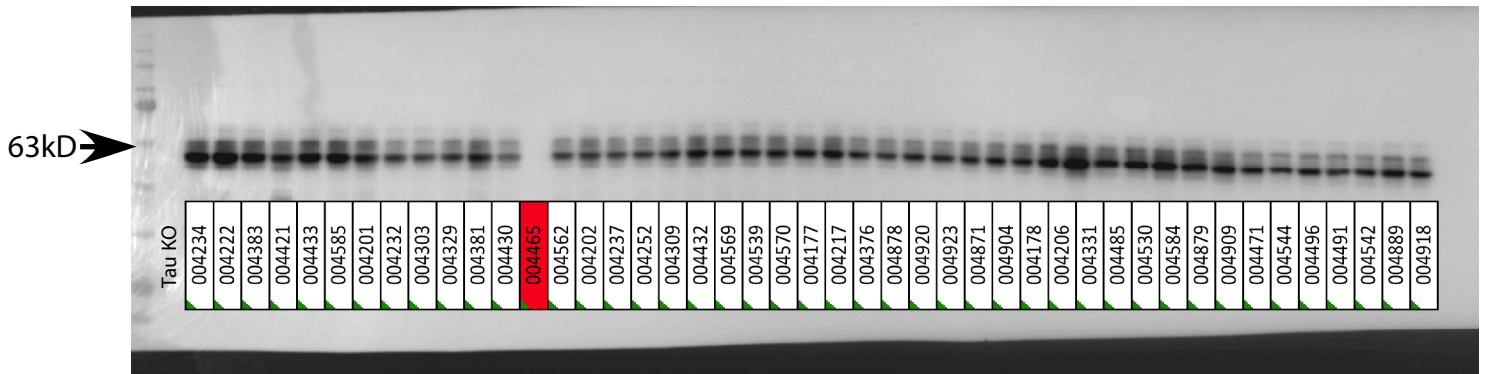

## 7. Total Tau

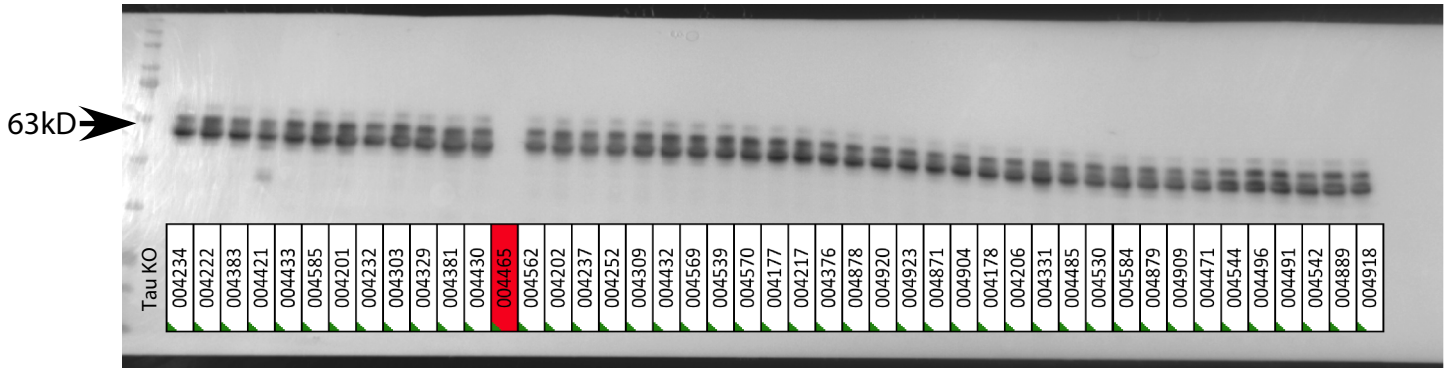

## 8. $\beta$ -actin

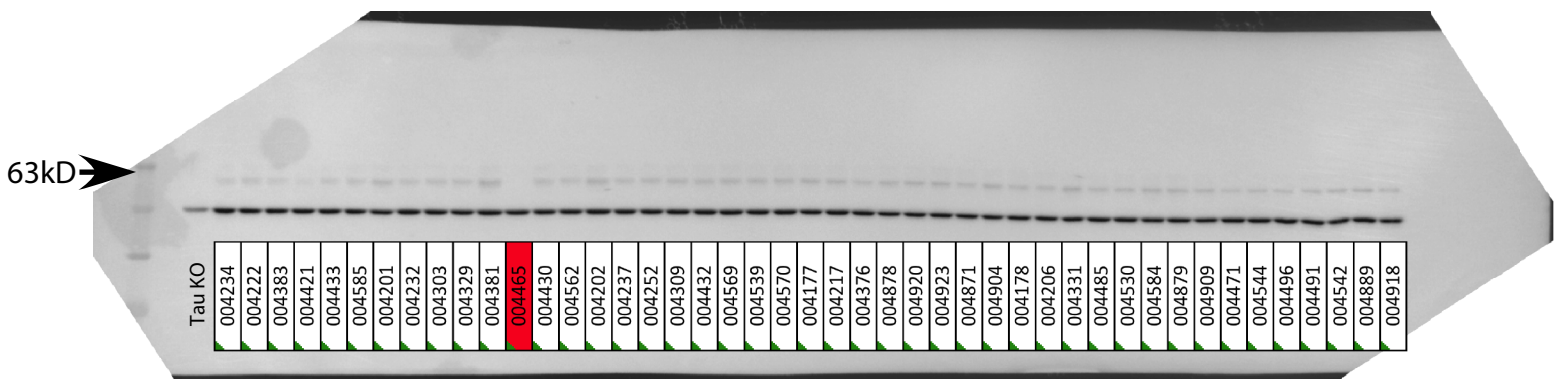

**Figure 4**

**A. Soluble Tau**

**1. Total Tau**

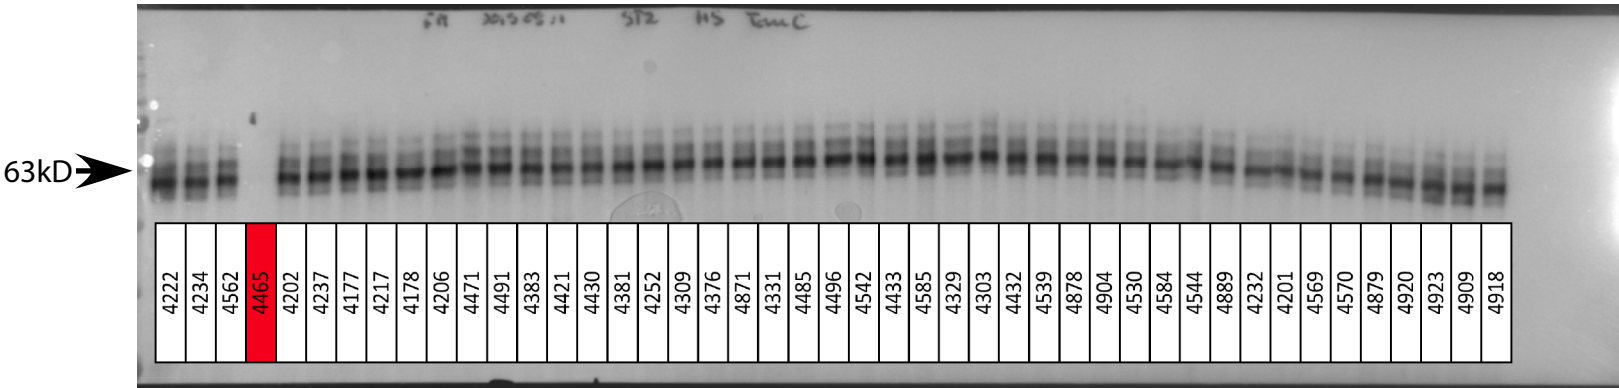

**2. Human Tau**

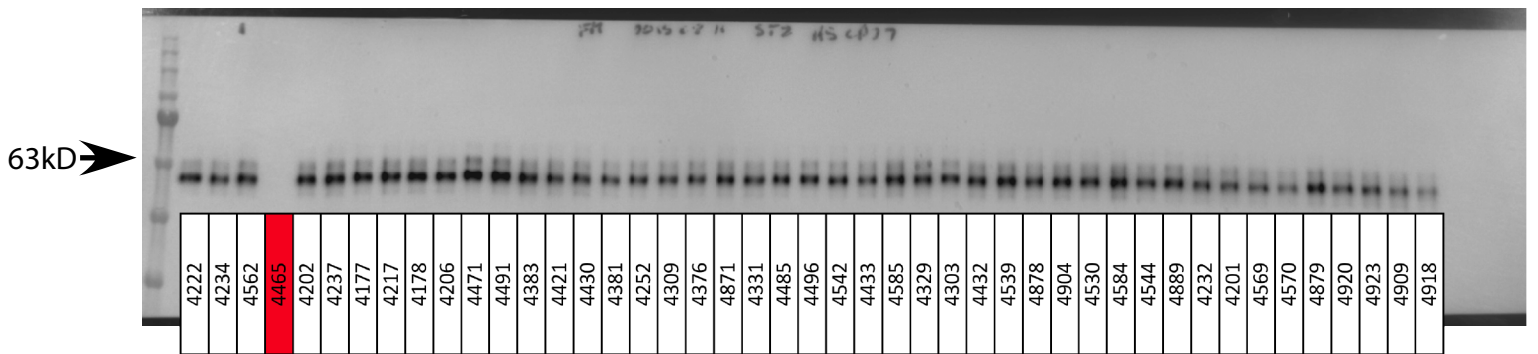

**B. Insoluble Tau**

**3. Total Tau**

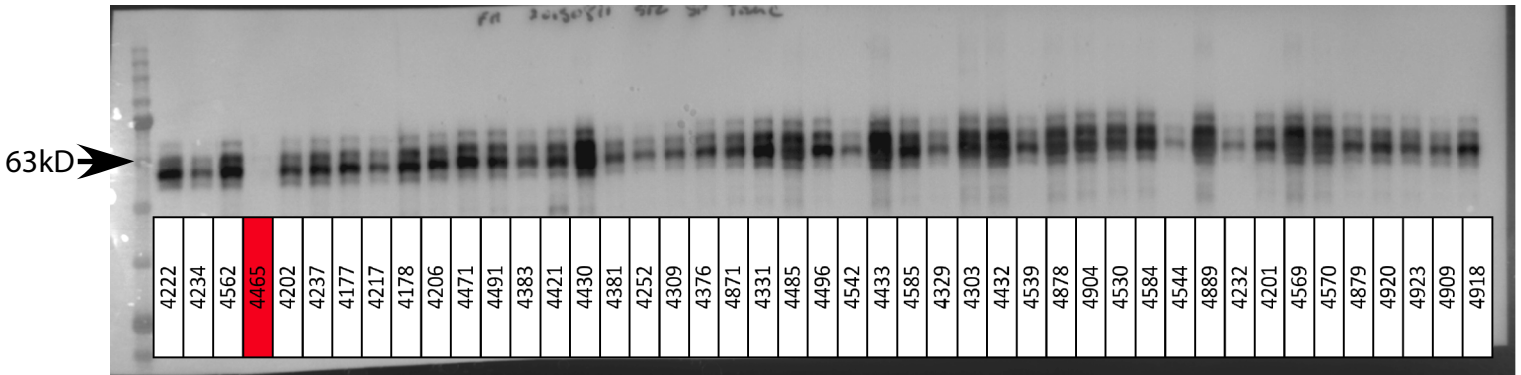

**4. Human Tau**

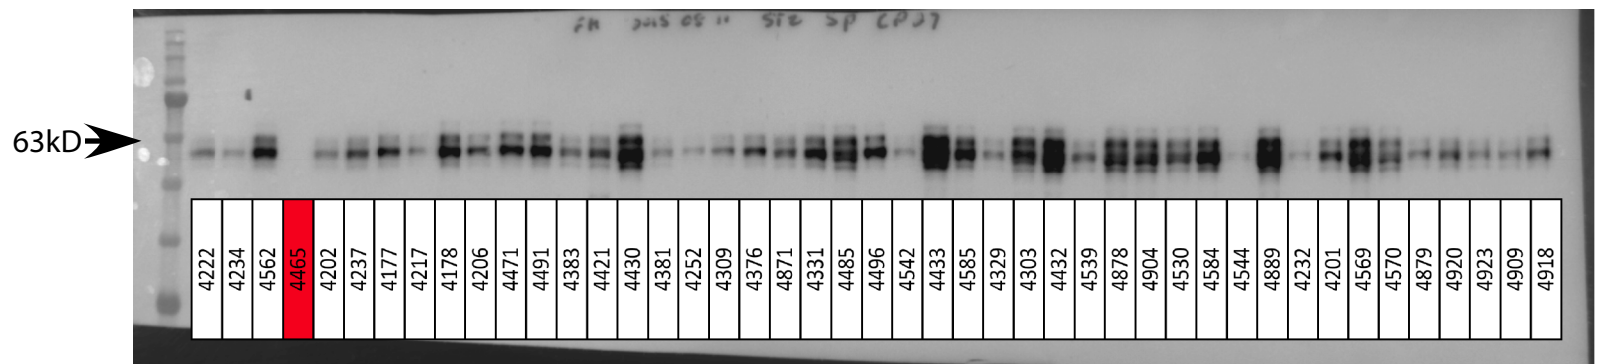

Figure 5

1. pCaMKII

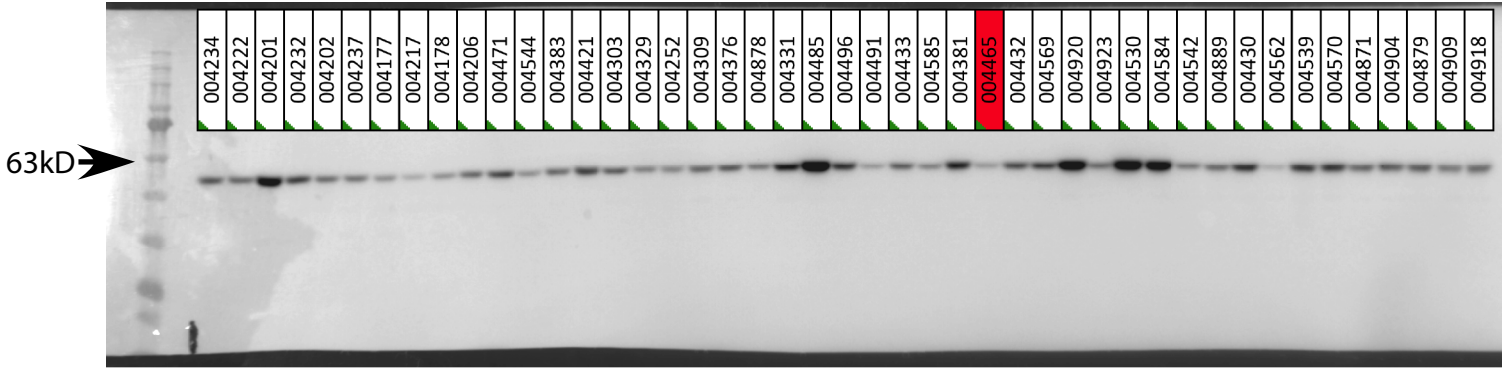

2. CaMKII

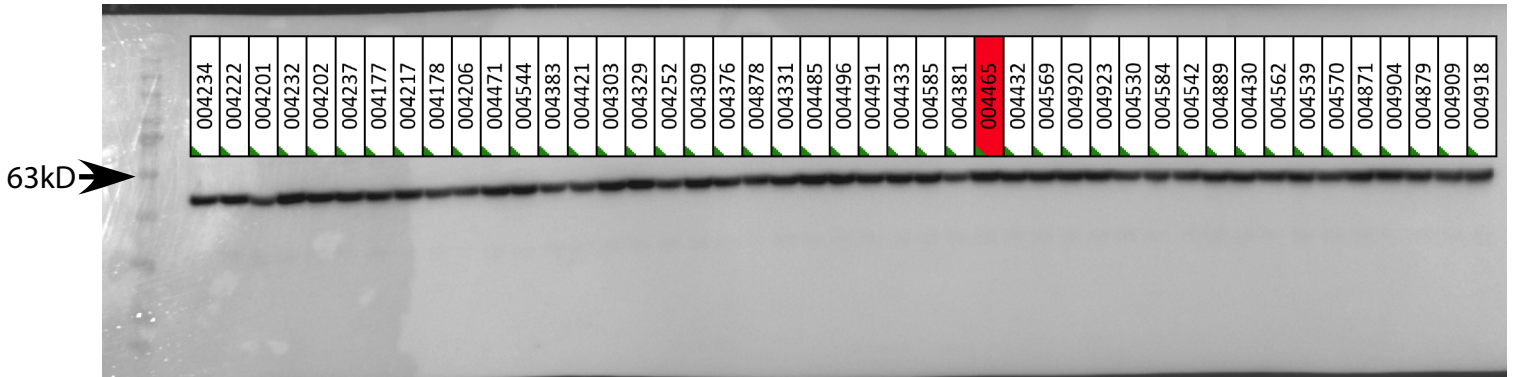

3. pJNK

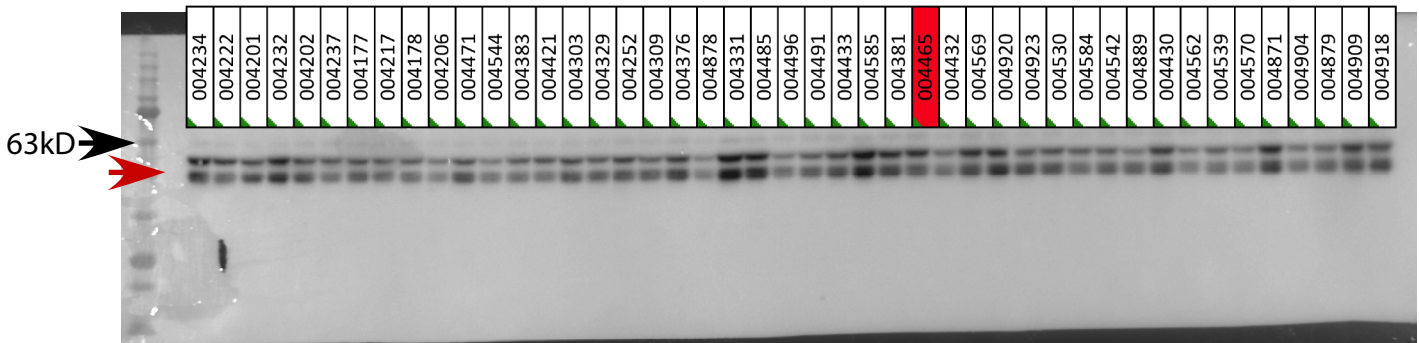

4. JNK

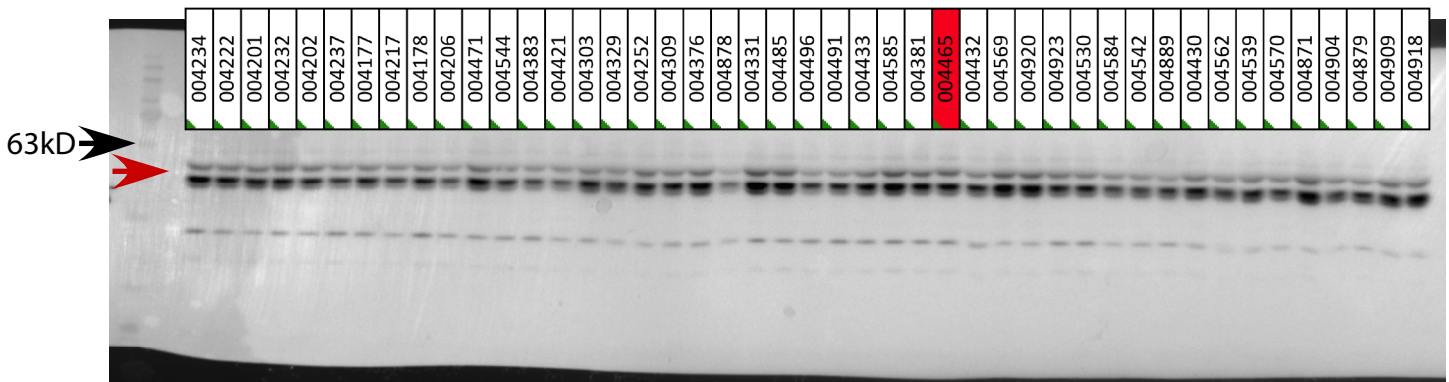

### 5. pS9-GSK3 $\beta$

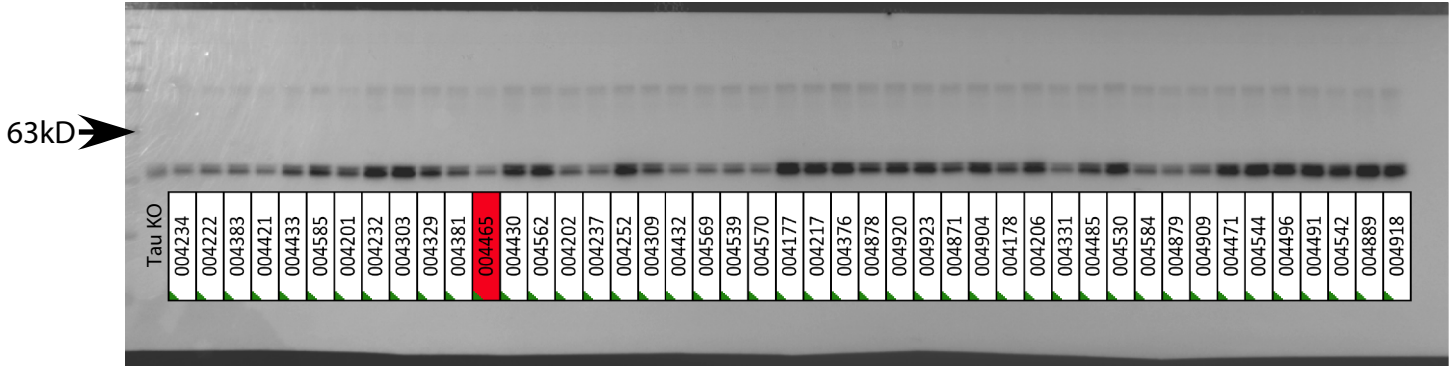

### 6. GSK3 $\beta$

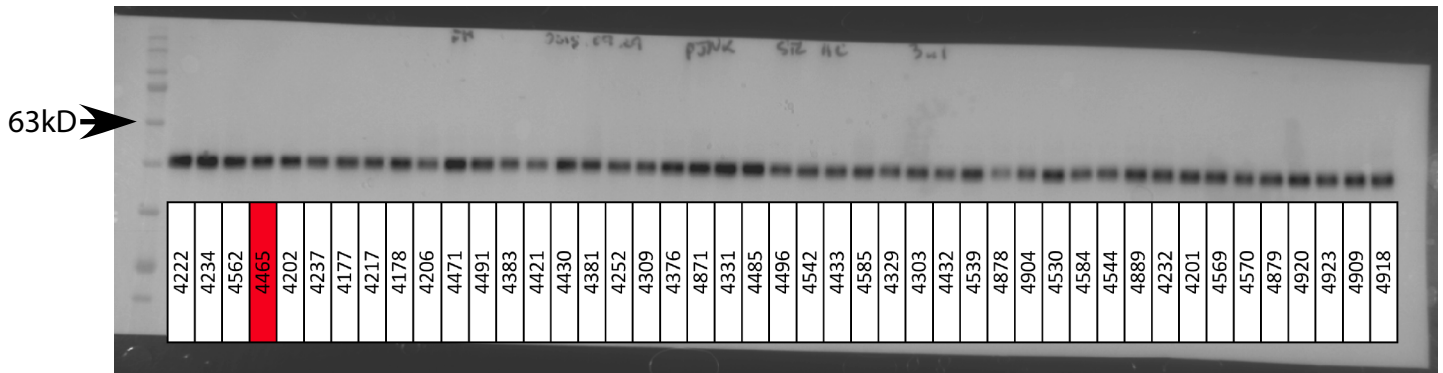

### 7. pP38

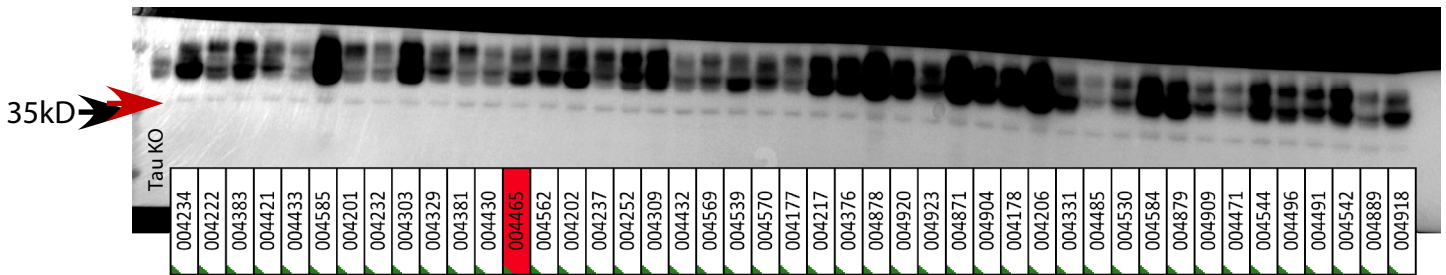

### 8. P38

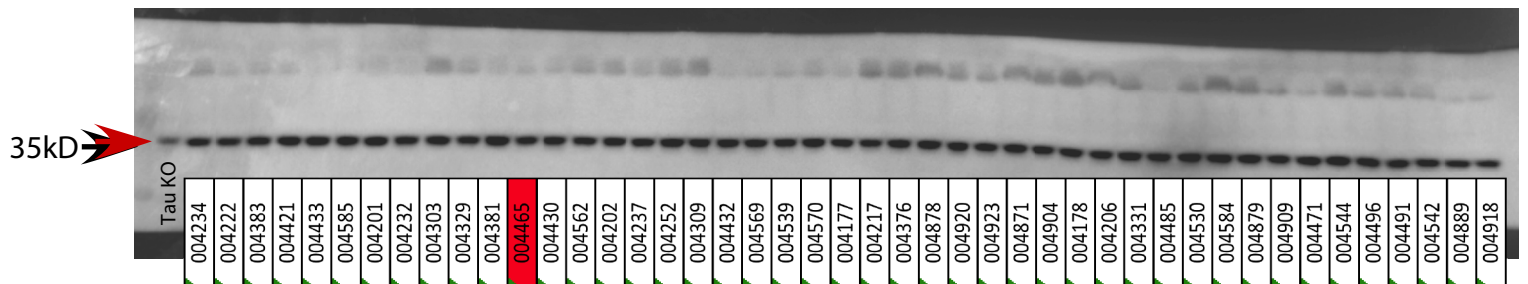

### 9. pERK

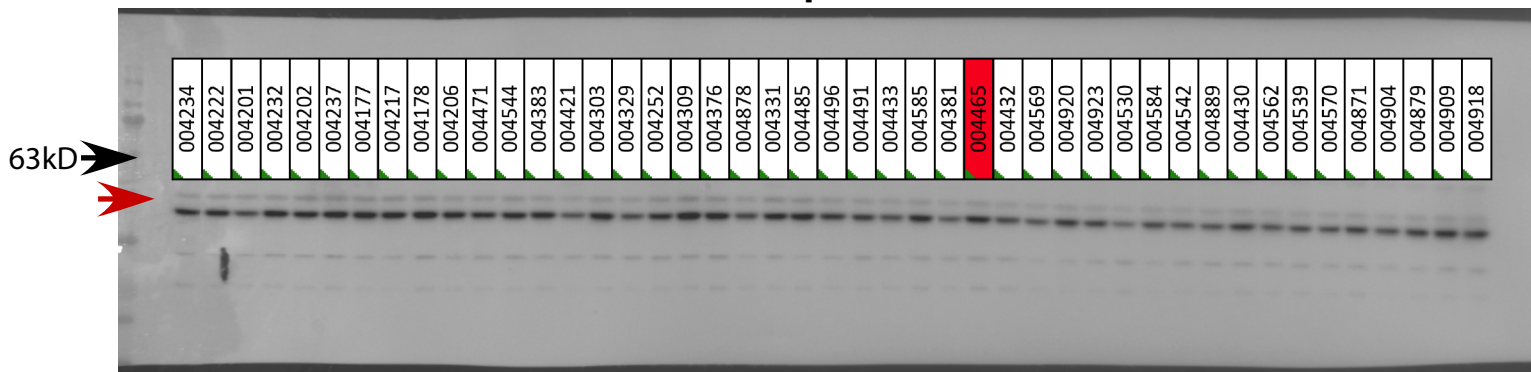

### 10. ERK

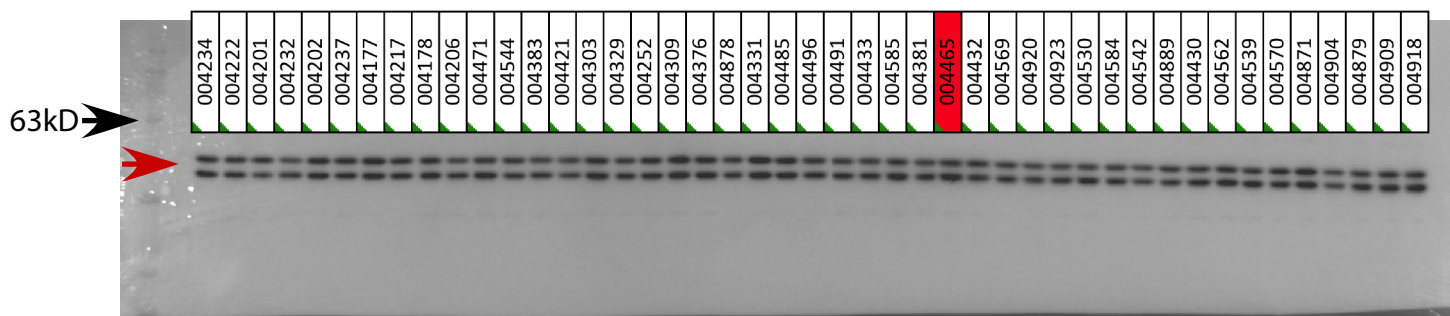

### 11. cdk5

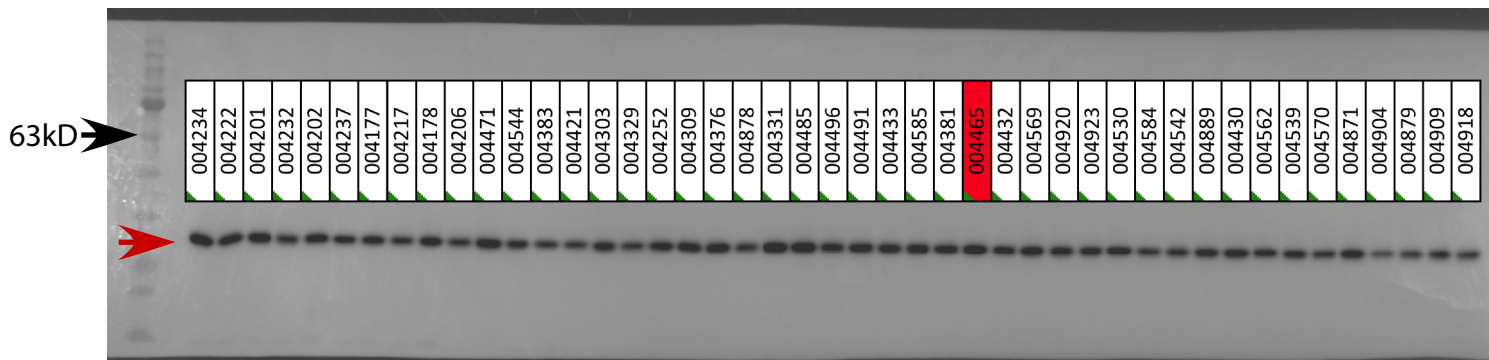

### 12. p35

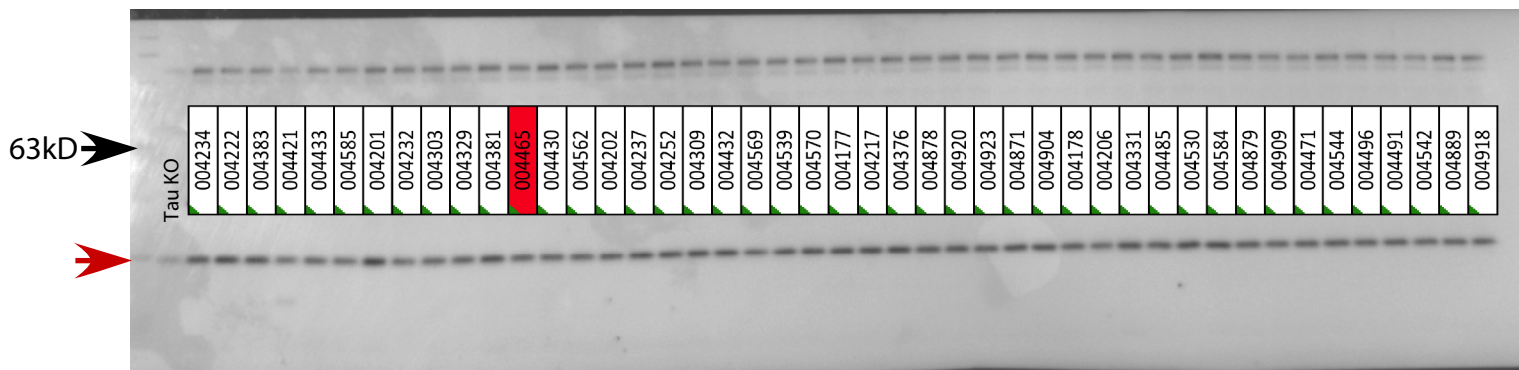



Figure 6

1. PP1

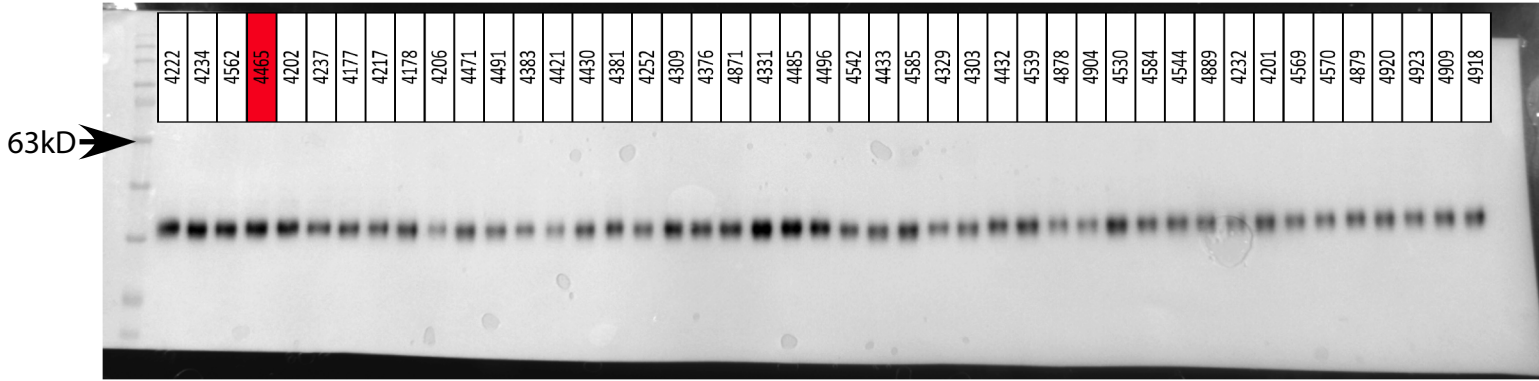

2. PP2A-A

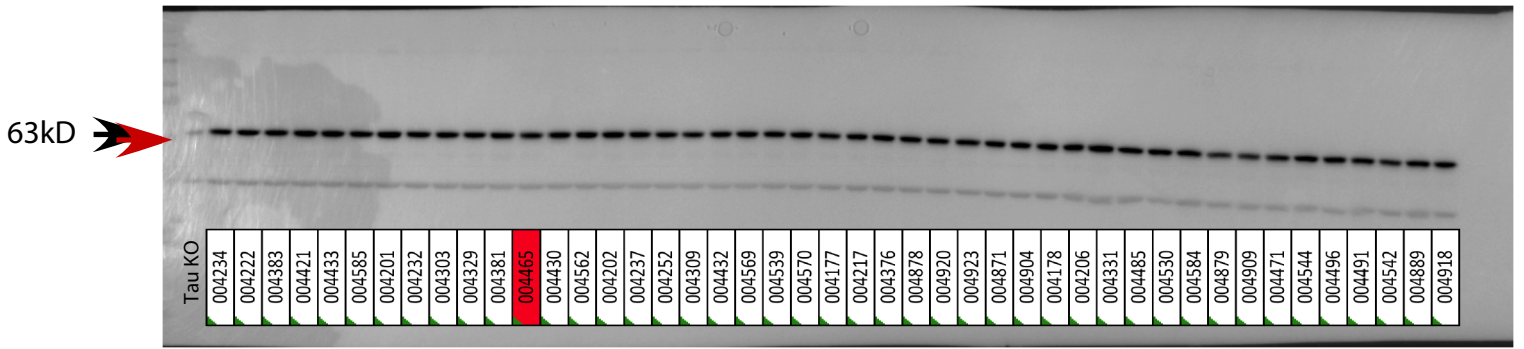

3. PP2A-B $\alpha$

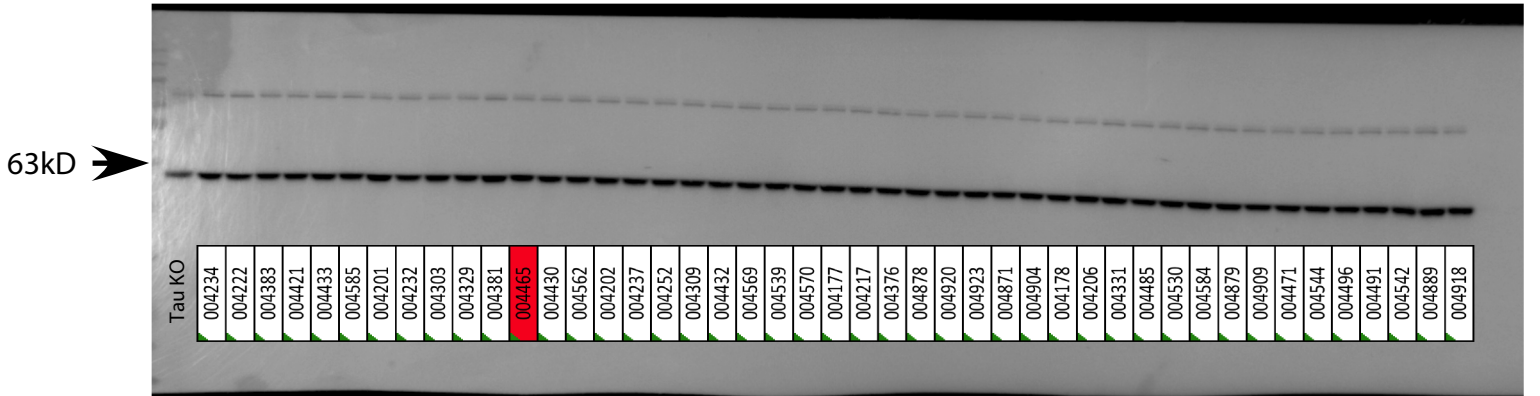

4. PP2A-B $\beta$

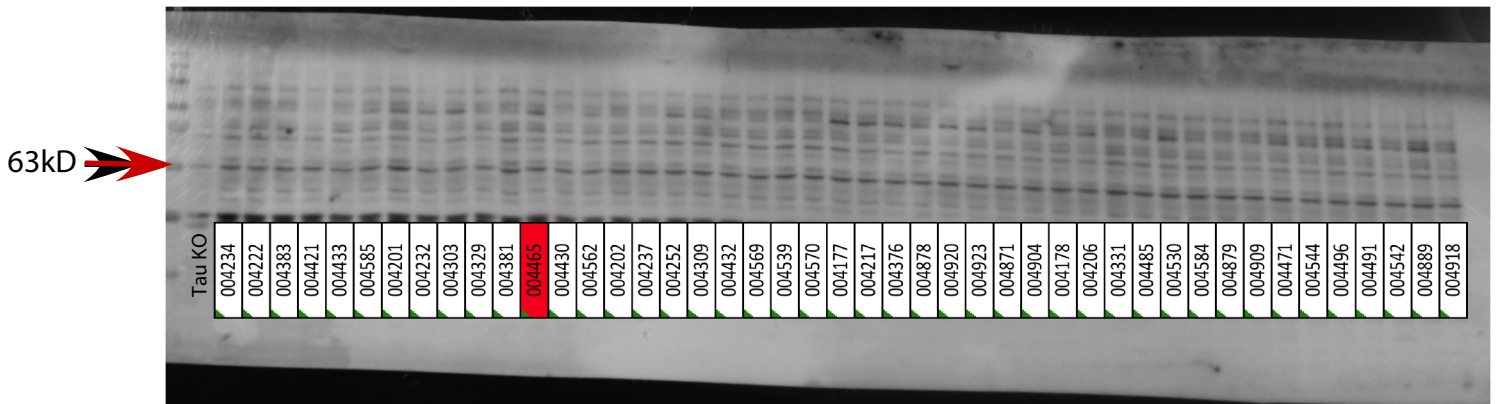

### 5. demPP2A-C

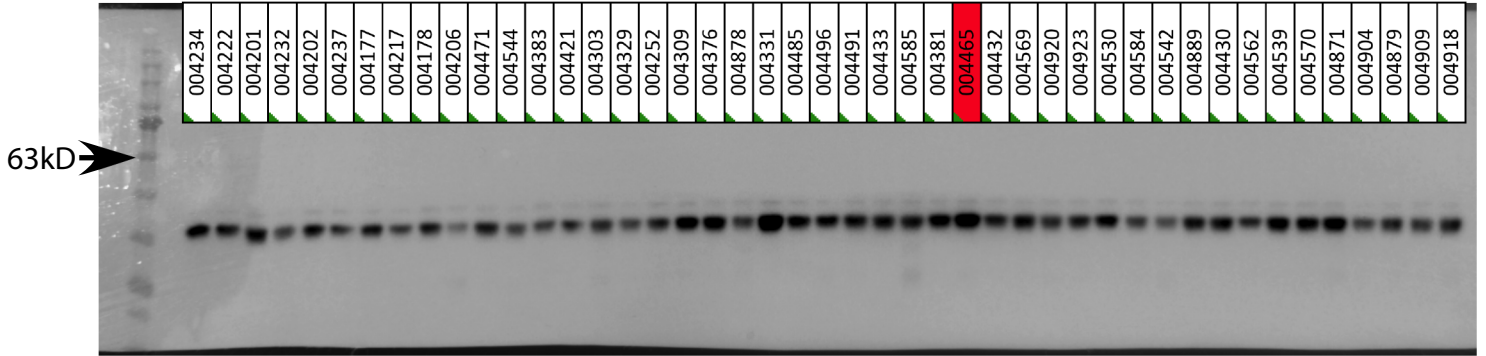

### 6. PP2A-C

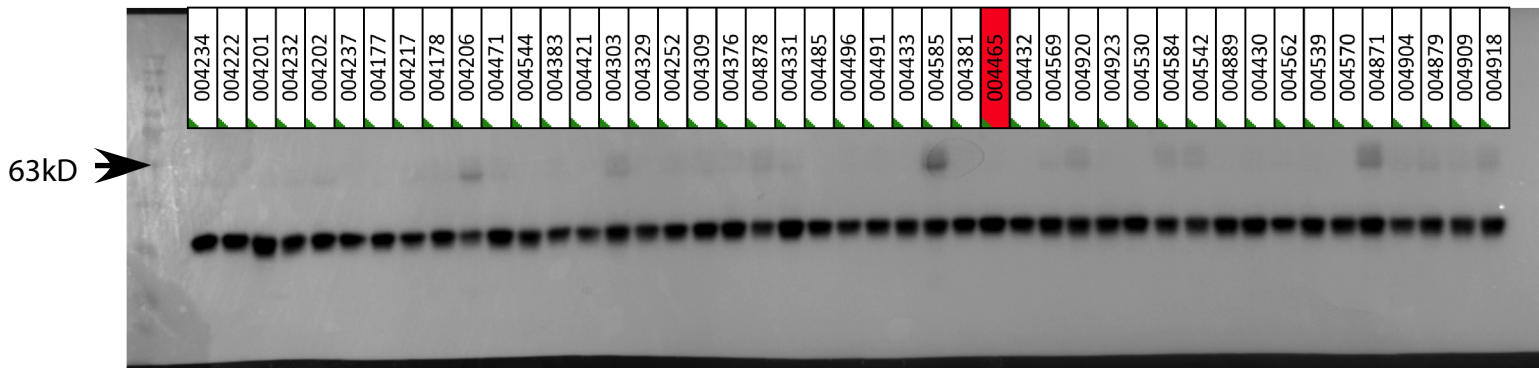

### 7. PP2B

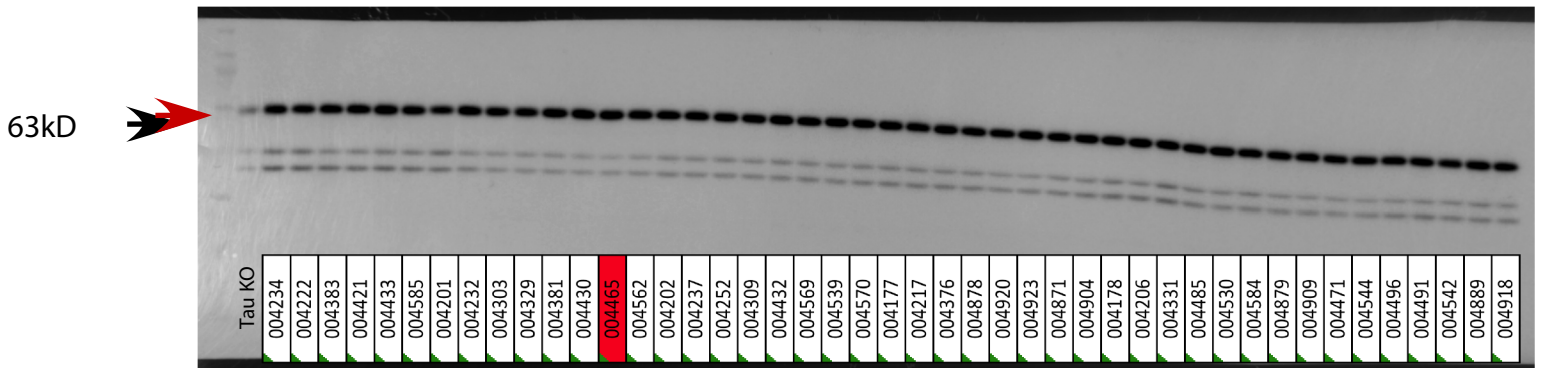

### 8. PP5

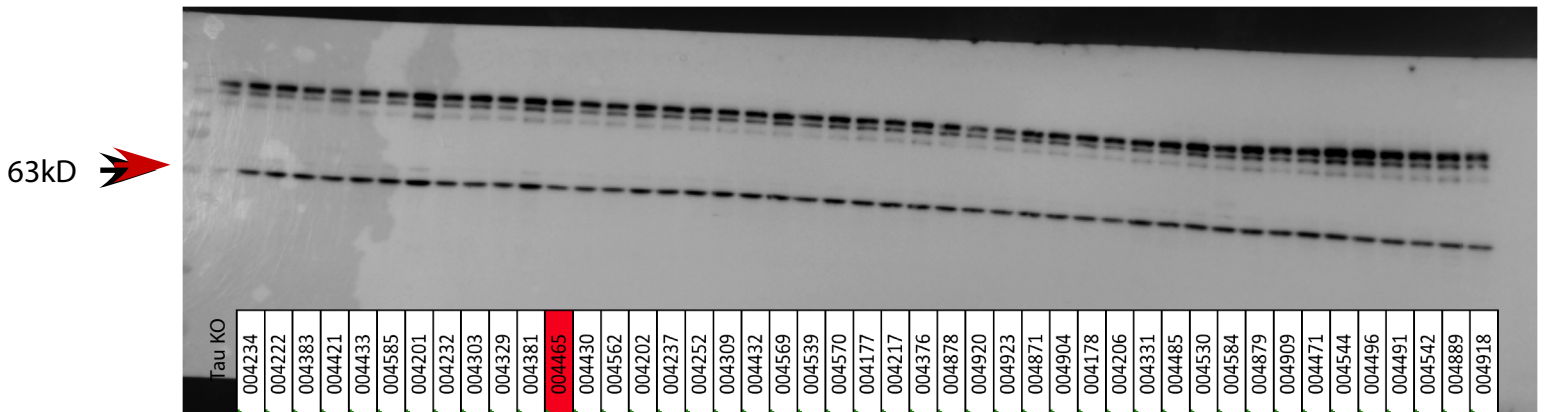

## 9. pPTEN

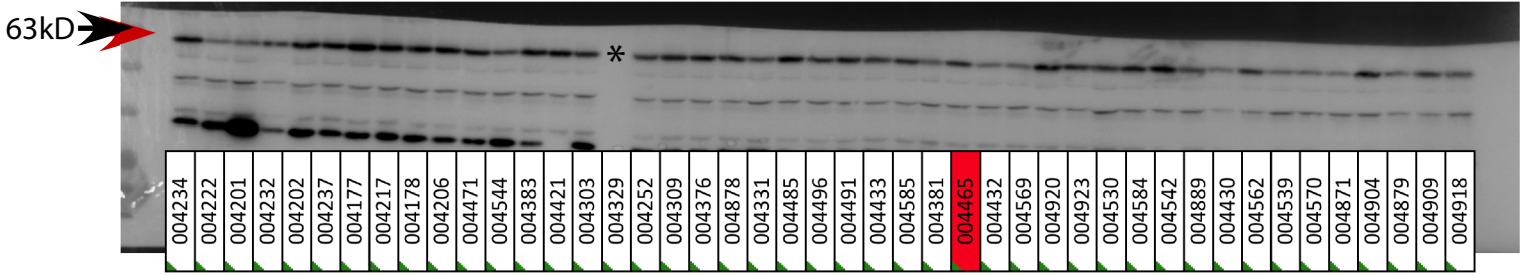

## 10. PTEN

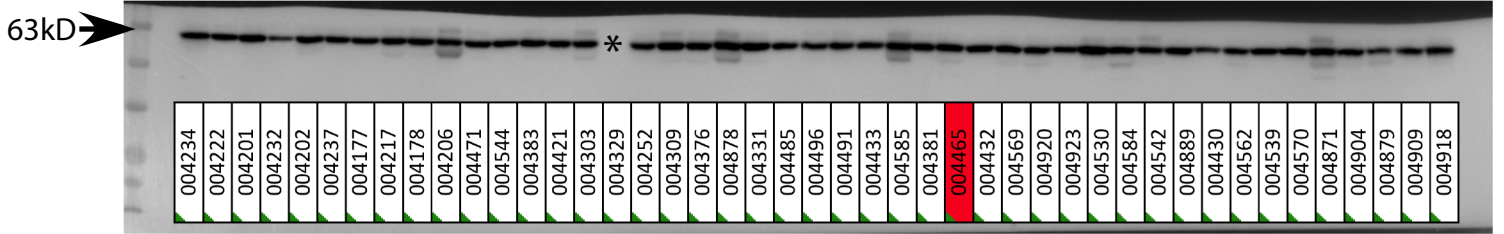

\* No more sample

# Figure 7

## 1. pIR

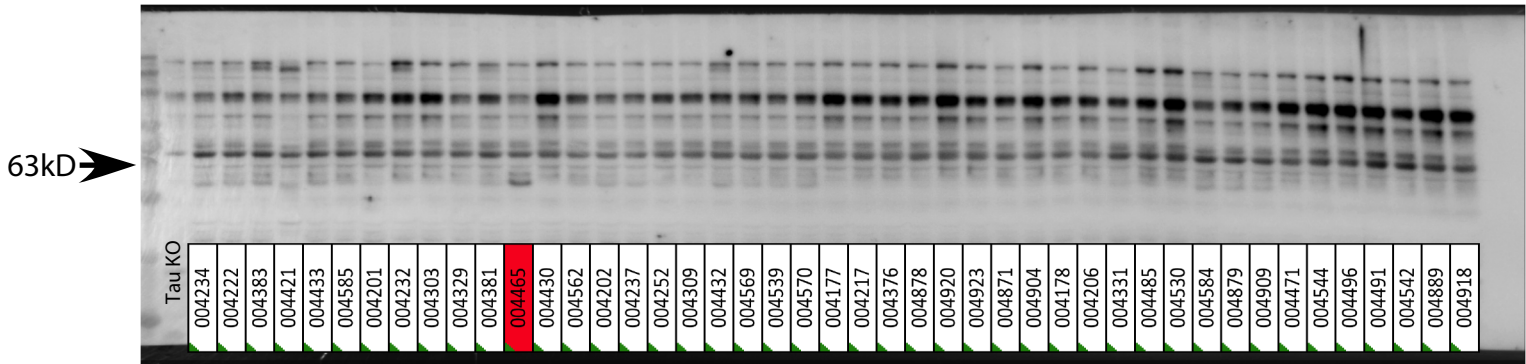

## 2. IR

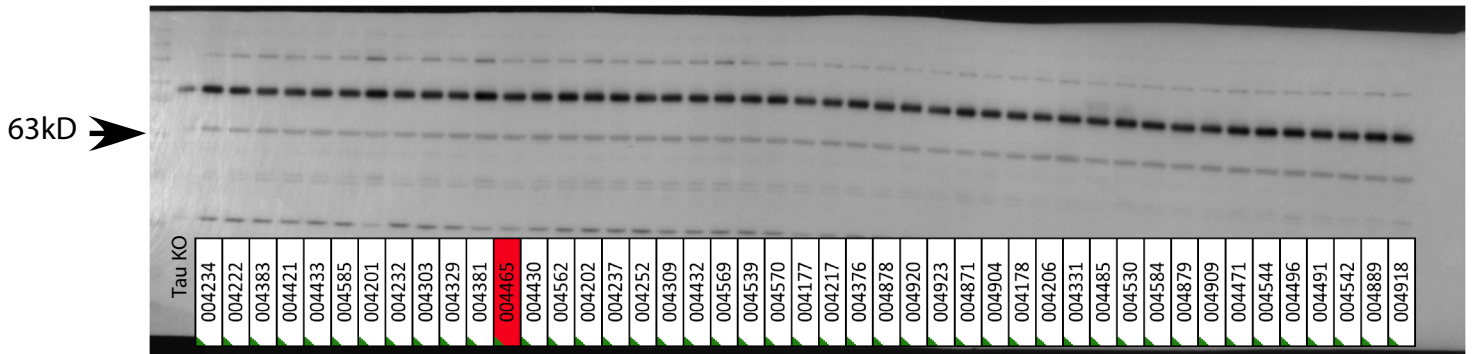

## 3. pIGF-1 R

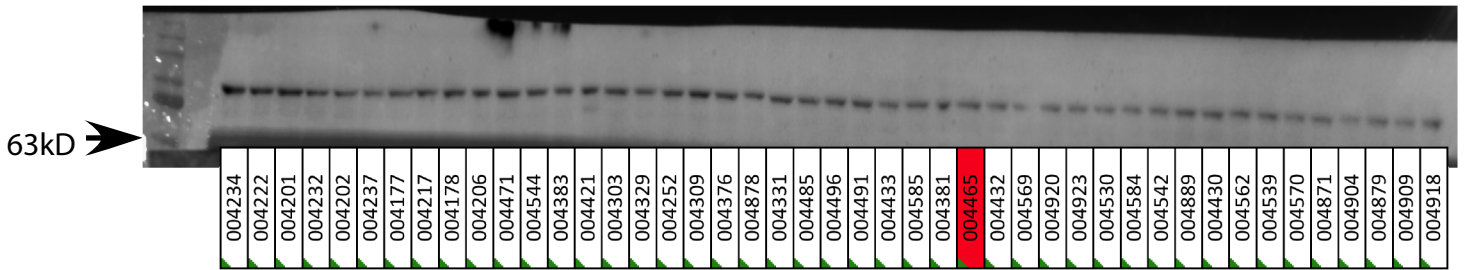

## 4. IGF-1 R

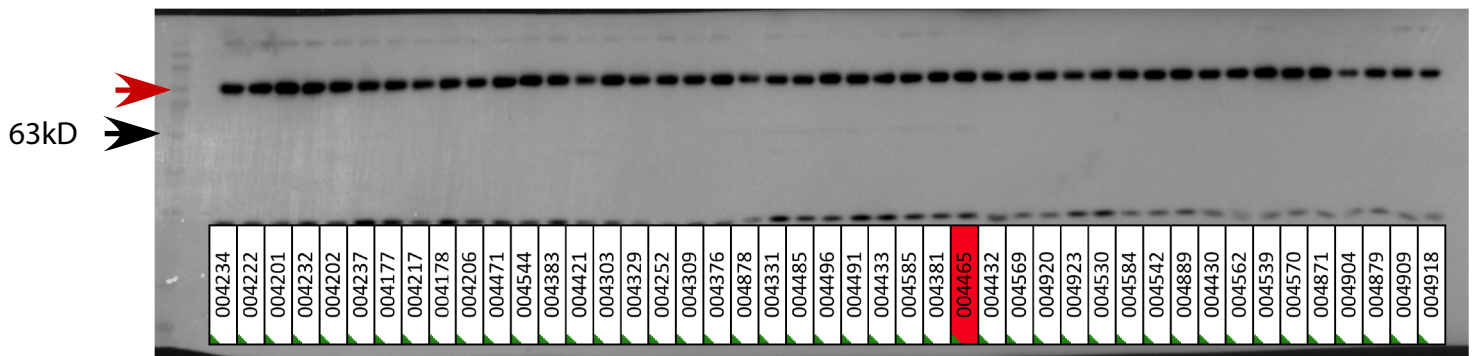

## 5. pPI3K

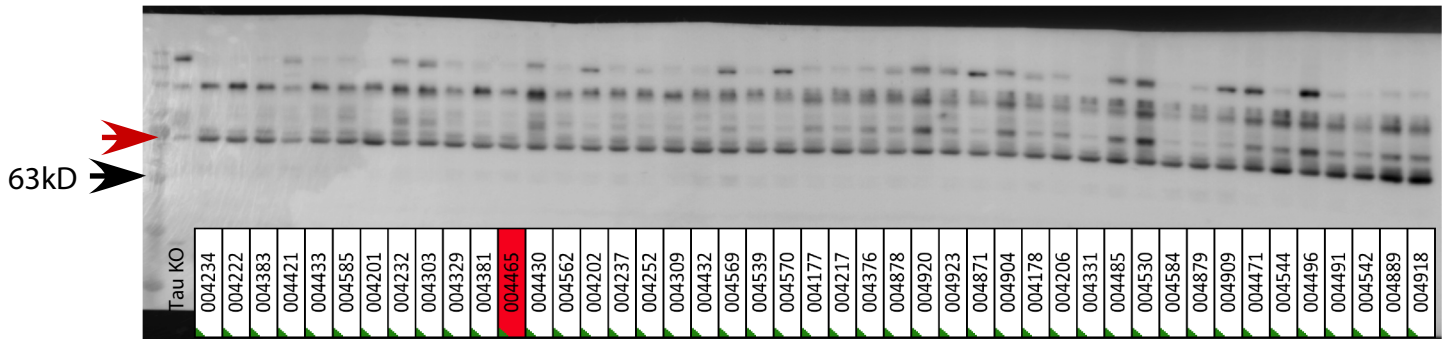

## 6. PI3K

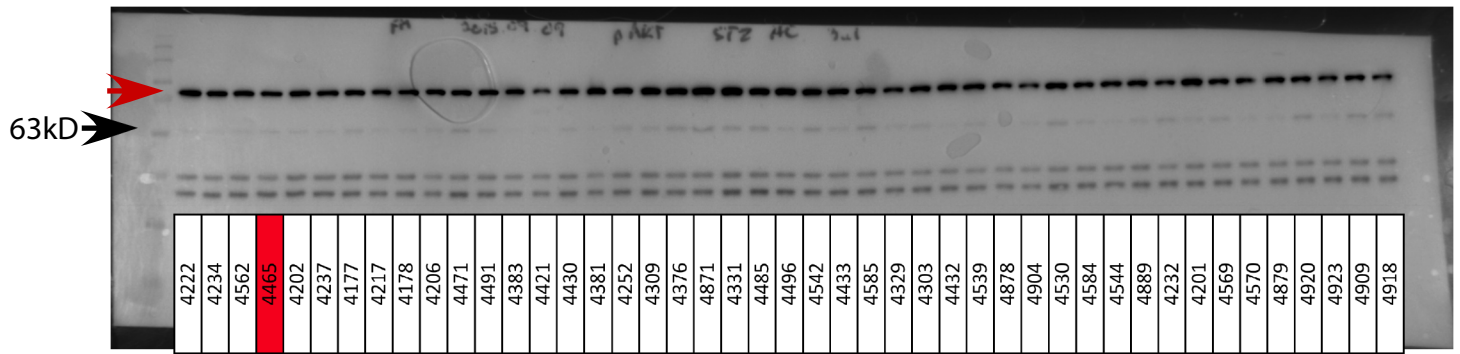

## 7. pAKT

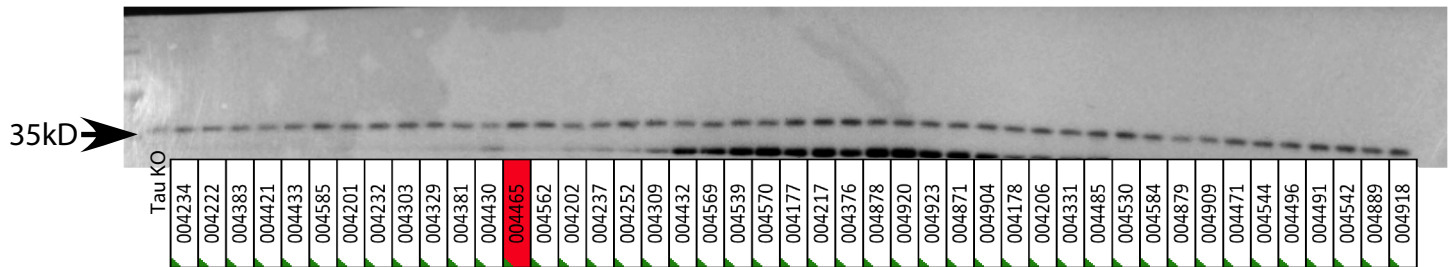

## 8. AKT

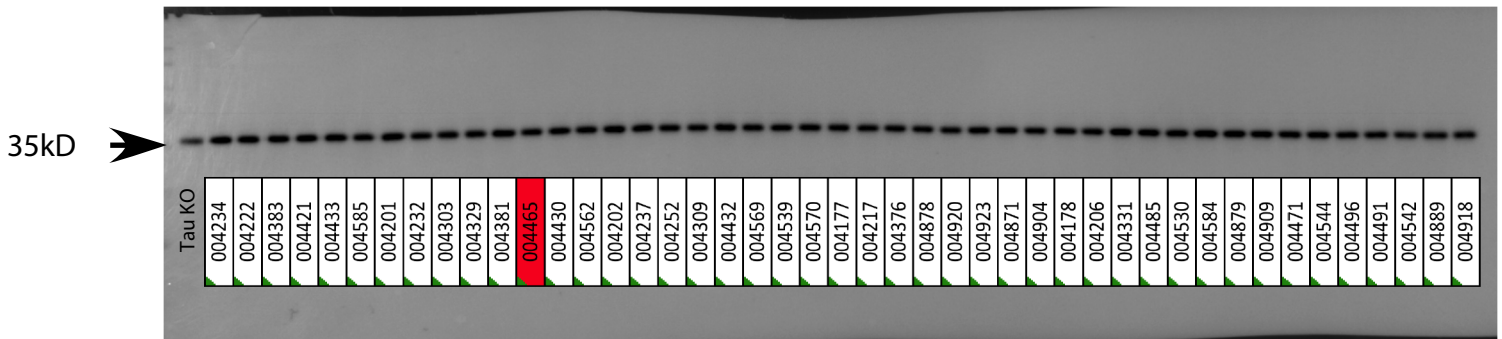

Figure 8

1. Drebrin

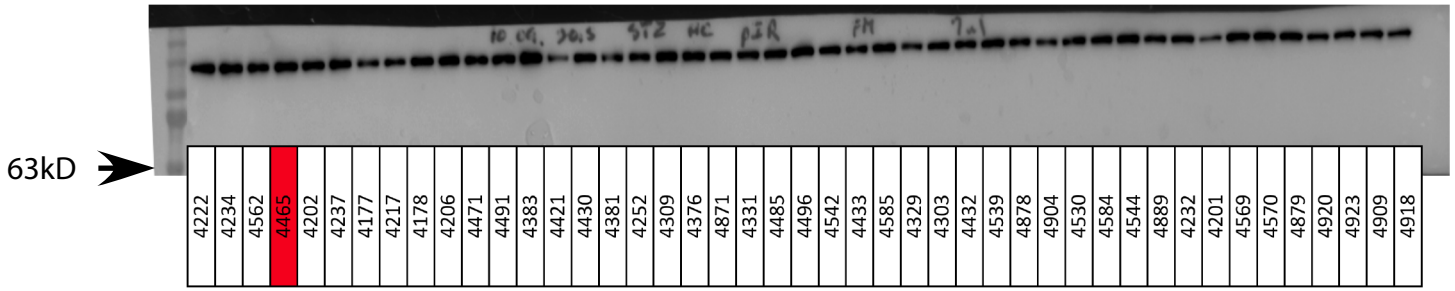

2. Synaptophysin

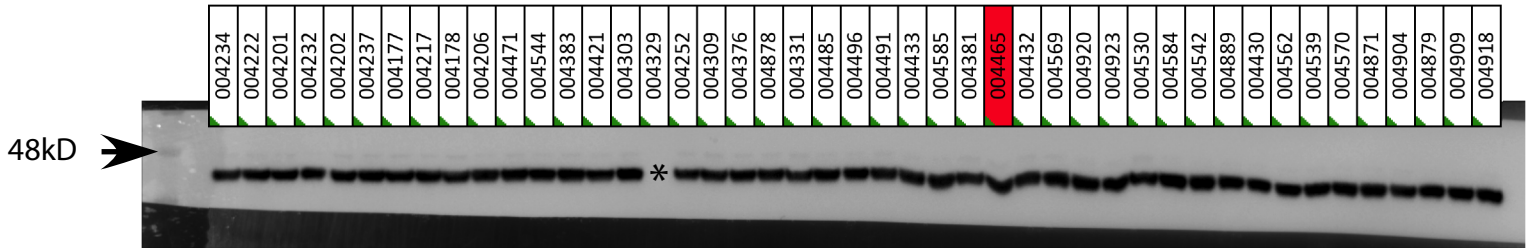

3. SNAP25

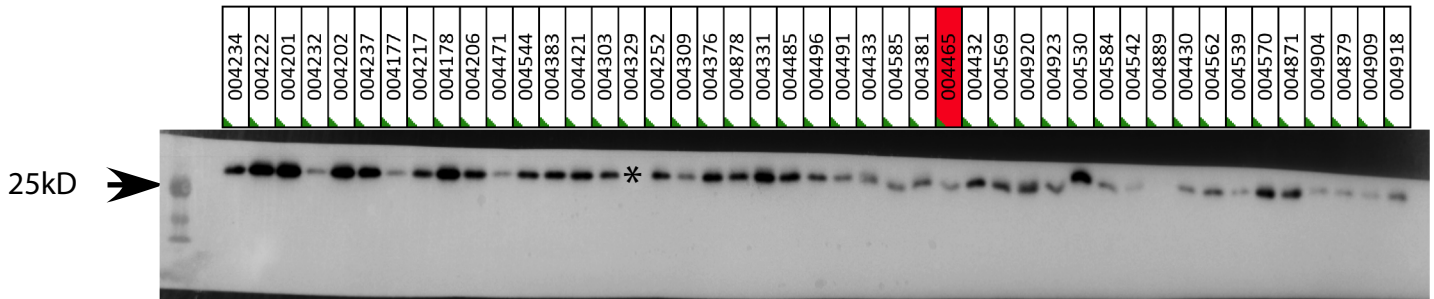

4. PSD95

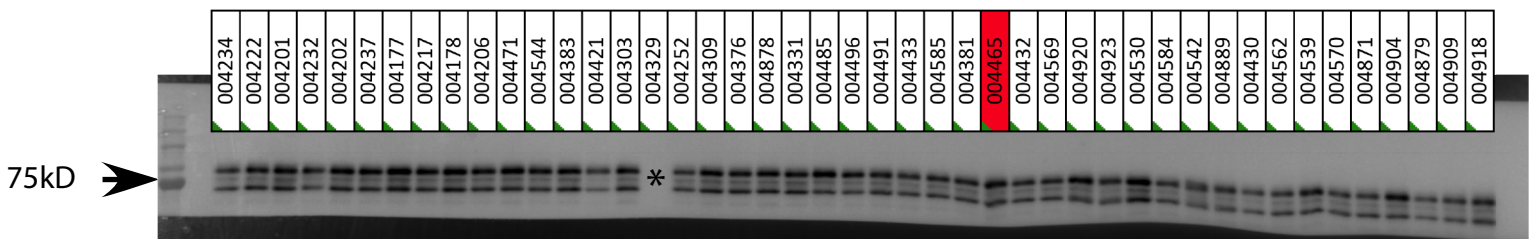

\* No more sample
